# Supplementary material for: Comparison of Granites from the Eastern and Western Districts of the Gejiu Ore District in South China: Implication for Petrogenesis and Tin Metallogeny
Source: MDPI journal article supplement (doi:10.3390/min13050691), 2023-05-19
Supplement: s1 [file s1]

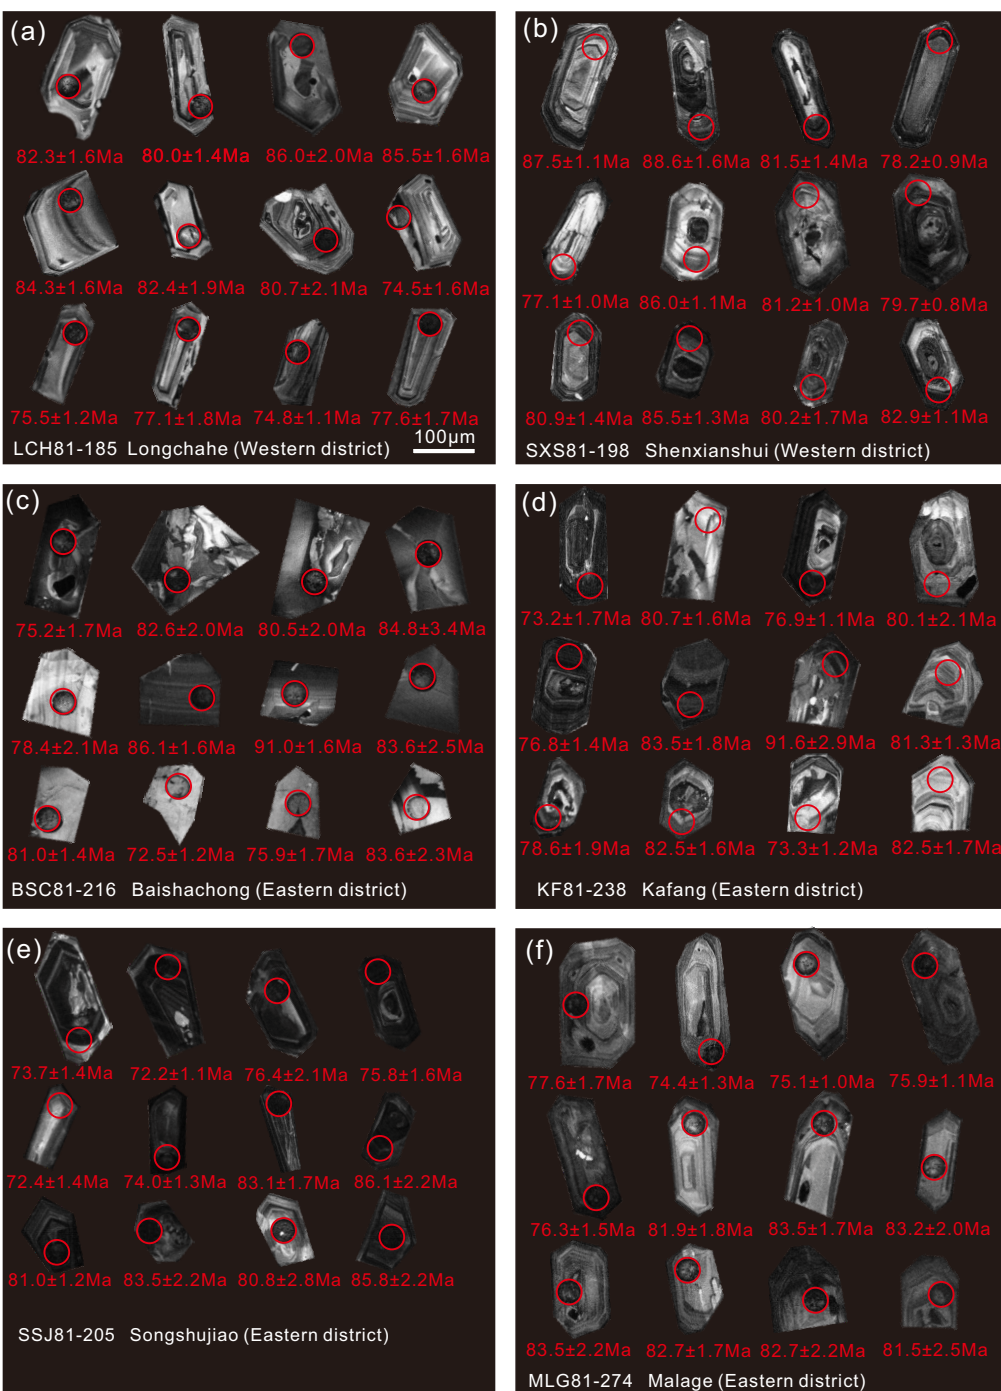

Figure S1. Cathodoluminescence images of zircon grains for Gejiu ore district, and the  $^{206}\text{Pb}/^{238}\text{U}$  ages of analytical spots are marked in red text.
