# Supplementary figures and images for: Comparison of Granites from the Eastern and Western Districts of the Gejiu Ore District in South China: Implication for Petrogenesis and Tin Metallogeny
Source: MDPI journal article supplement (doi:10.3390/min13050691), 2023-05-19

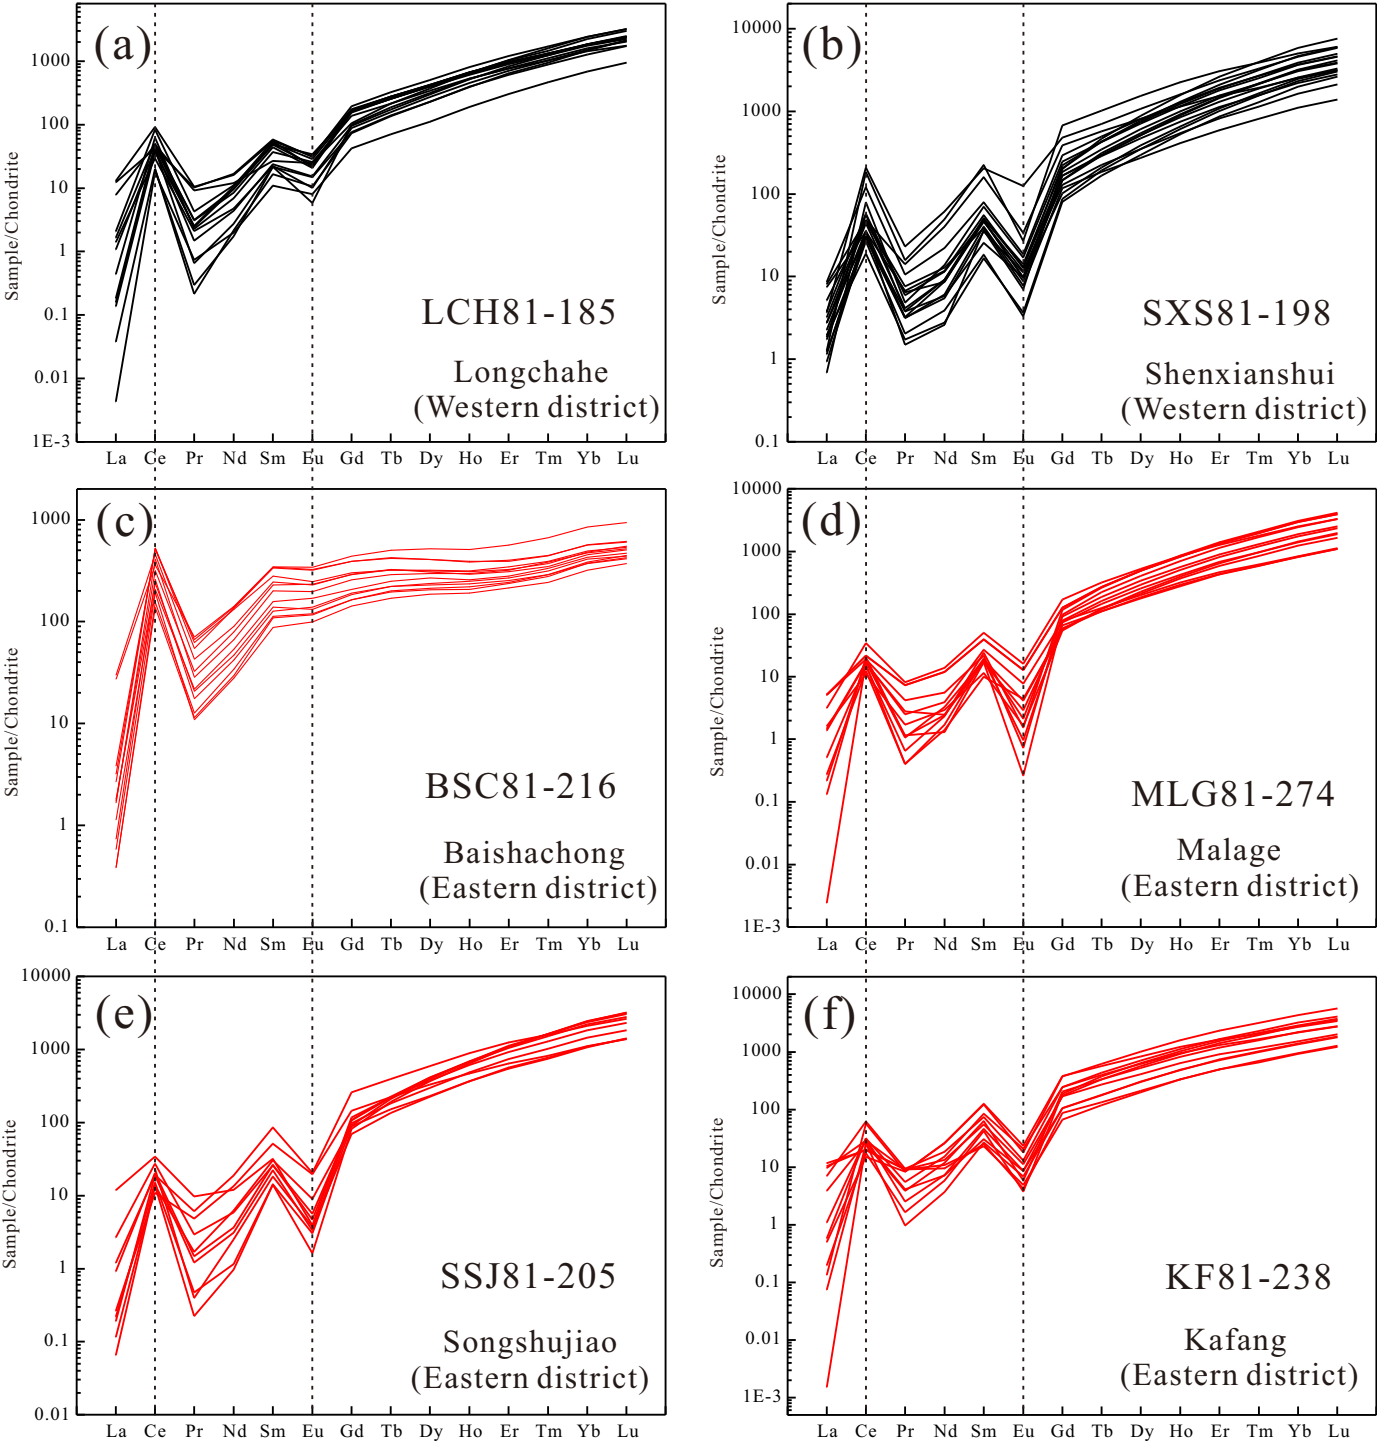

Figure S2. (a-f) Zircon chondrite-normalized REE distribution patterns of Gejiu ore district.

Supplement: s1 [file s1]
